# Supplementary material for: Toxicity of Carbon Nanomaterials and Their Potential Application as Drug Delivery Systems: In Vitro Studies in Caco-2 and MCF-7 Cell Lines
Source: PubMed Central journal article supplement (PMC7466705; doi:10.3390/nano10081617), 2020-08-18
Supplement: nanomaterials-10-01617-s001.pdf [file nanomaterials-10-01617-s001.pdf]

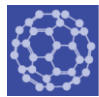

# Toxicity of Carbon Nanomaterials and Their Potential Application as Drug Delivery Systems: In Vitro Studies in Caco-2 and MCF-7 Cell Lines

Rosa Garriga <sup>1,\*</sup>, Tania Herrero-Continente <sup>2</sup>, Miguel Palos <sup>3</sup>, Vicente L. Cebolla <sup>4</sup>, Jesús Osada <sup>2,5</sup>, Edgar Muñoz <sup>4</sup> and María Jesús Rodríguez-Yoldi <sup>3,5,\*</sup>

<sup>1</sup> Departamento de Química Física, Universidad de Zaragoza, 50009 Zaragoza, Spain

<sup>2</sup> Departamento de Bioquímica y Biología Molecular, Universidad de Zaragoza, 50013 Zaragoza, Spain; taniaherrero1992@gmail.com (T.H.-C.); josada@unizar.es (J.O.)

<sup>3</sup> Departamento de Farmacología y Fisiología, Universidad de Zaragoza, 50013 Zaragoza, Spain; mpalosmarg@gmail.com

<sup>4</sup> Instituto de Carboquímica ICB-CSIC, Miguel Luesma Castán 4, 50018 Zaragoza, Spain; vcebolla@icb.csic.es (V.L.C.); edgar@icb.csic.es (E.M.)

<sup>5</sup> CIBEROBN (ISCIII), IIS Aragón, IA2, 50009 Zaragoza, Spain

\* Correspondence: rosa@unizar.es (R.G.); mjrodyol@unizar.es (M.J.R.-Y.); Tel.: +34-976-762294 (R.G.); +34-976-761649 (M.J.R.-Y.)

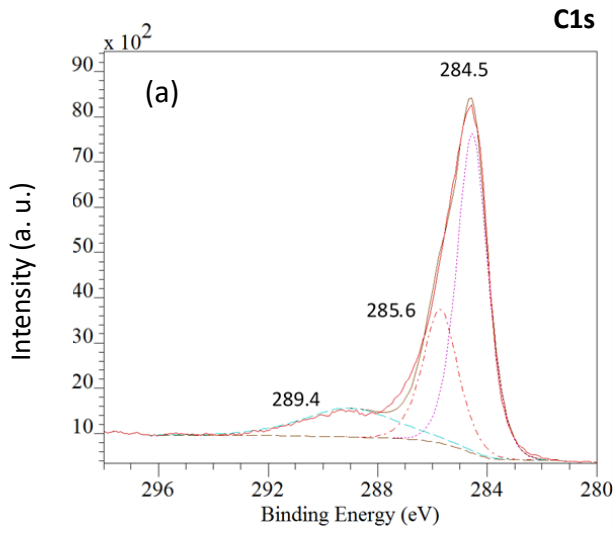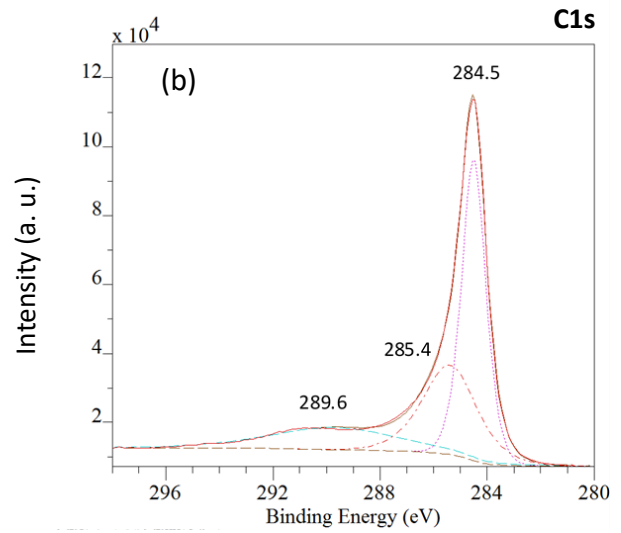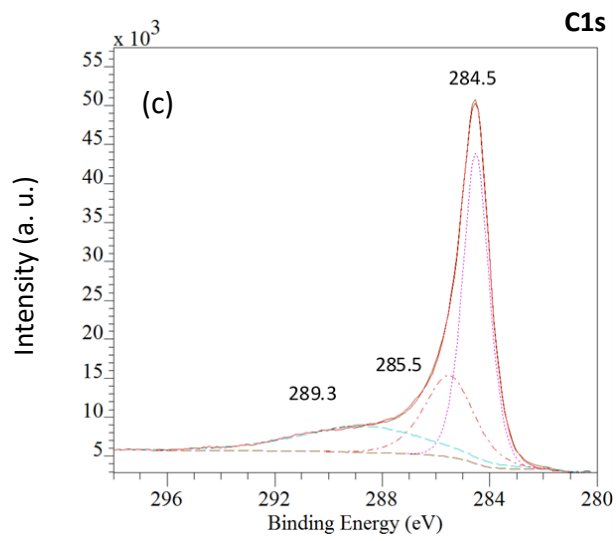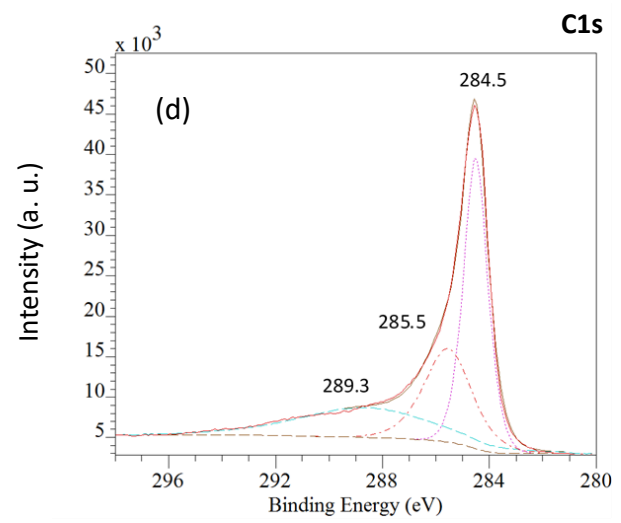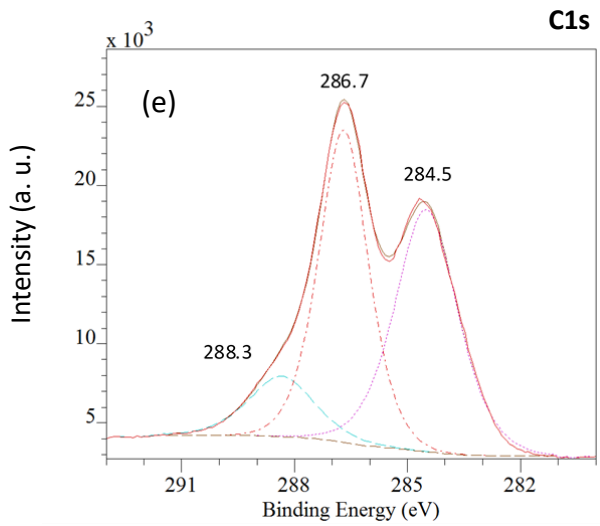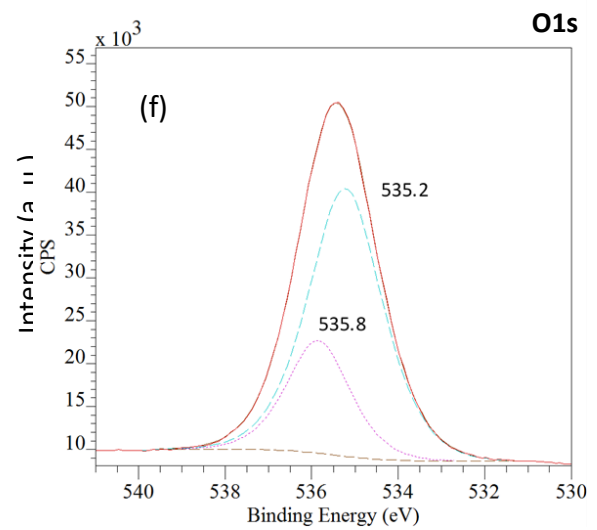

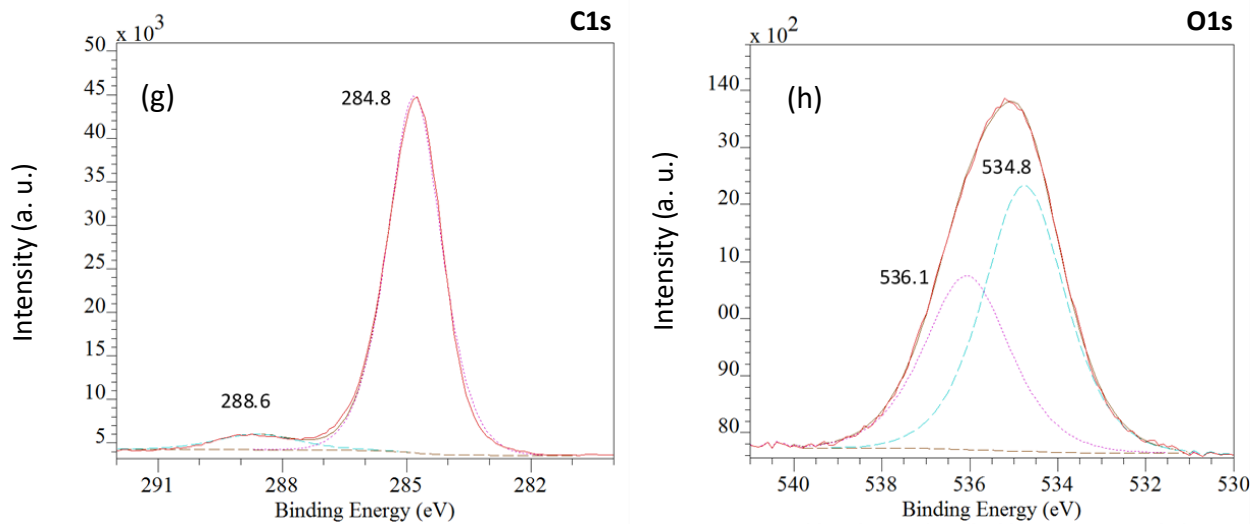

**Figure S1.** C1s and O1s regions in high resolution XPS spectra of carbon nanomaterials: (a) CNH, (b) CNT, (c) CNP, (d) RGO, (e, f) GO and (g, h) ND. In (a-d), C1s features at 284.5, ~285.4, and ~289.5 eV are assigned to  $sp^2$  C=C,  $sp^3$  C-C, and  $\pi$ - $\pi^*$  transitions, respectively. In (e), C1s XPS spectra show a wide peak at 284.5 ( $sp^2$  C=C,  $sp^3$  C-C), at 286.7 (C-O-C, C-OH) and at 288.3 eV (C=O, COOH). In (g), C1s peaks at 284.8 and 288.6 eV correspond to  $sp^3$  C-C diamond bonds and (C=O, COOH), respectively. Oxygen content (% at.) of these carbon nanomaterials, obtained from XPS spectra, are collected in Table 1.

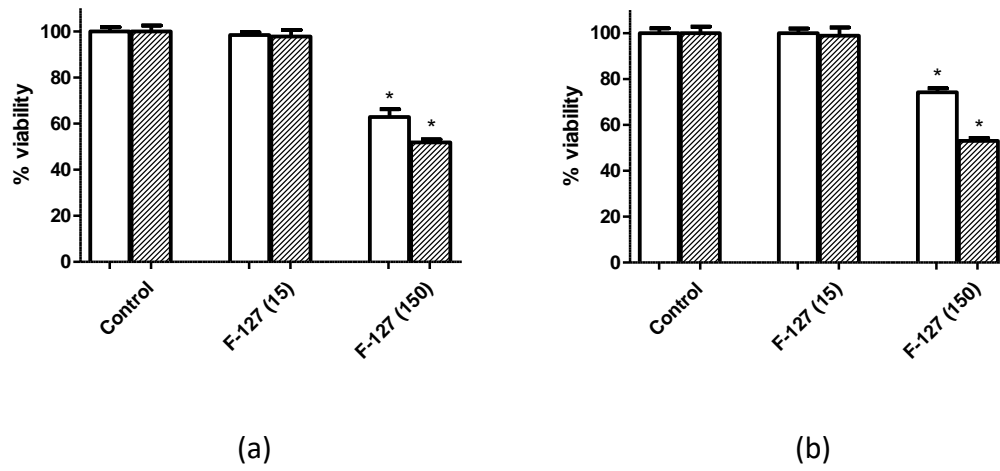

**Figure S2.** Cell viability assays after treatment with F-127 at 15 µg-mL<sup>-1</sup> and 150 µg-mL<sup>-1</sup> for 24 h (white) and 72 h (striped), on (a) Caco-2 and (b) MCF-7 cells. (\*represents significance at  $p < 0.05$  when compared to untreated control cells).

(a)

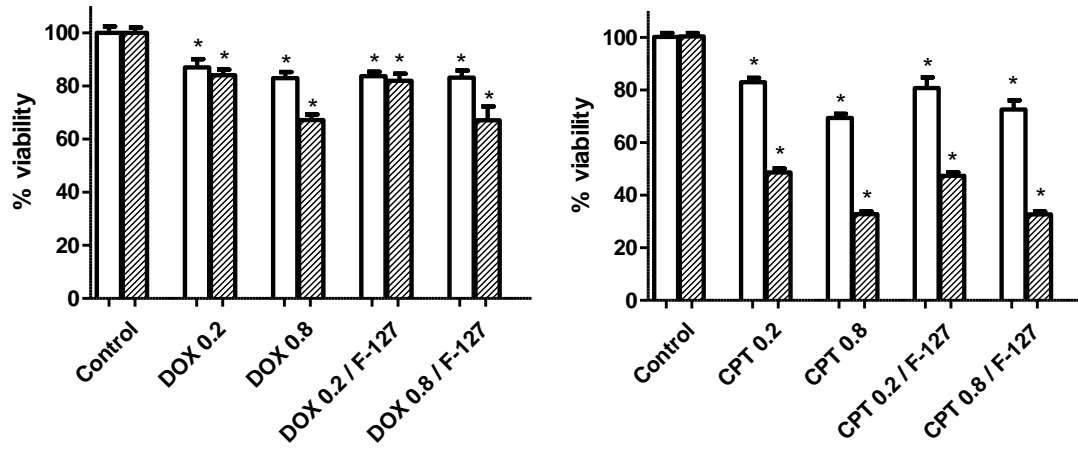

(b)

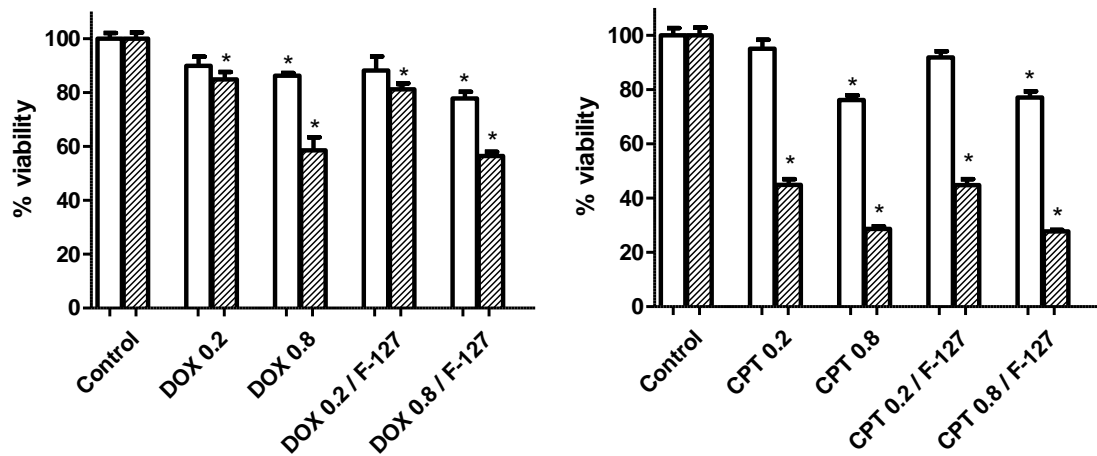

**Figure S3.** Cell viability assays after treatment with DOX and CPT at 0.2  $\mu\text{g}\cdot\text{mL}^{-1}$  and 0.8  $\mu\text{g}\cdot\text{mL}^{-1}$  for 24 h (white) and 72 h (striped), on (a) Caco-2 and (b) MCF-7 cells, showing no significant differences in the absence or in the presence of F-127 at 15  $\mu\text{g}\cdot\text{mL}^{-1}$ . (\*represents significance at  $p < 0.05$  when compared to untreated control cells).

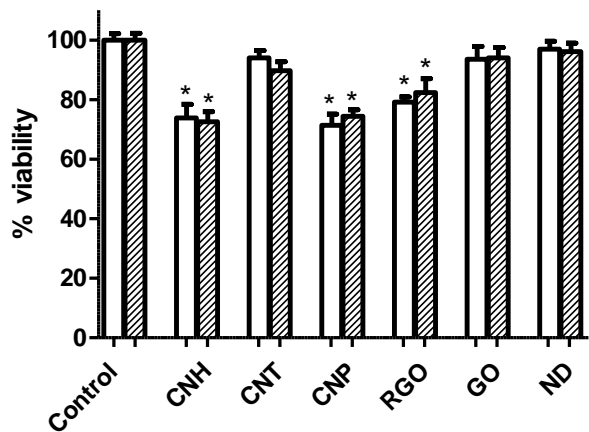

(a)

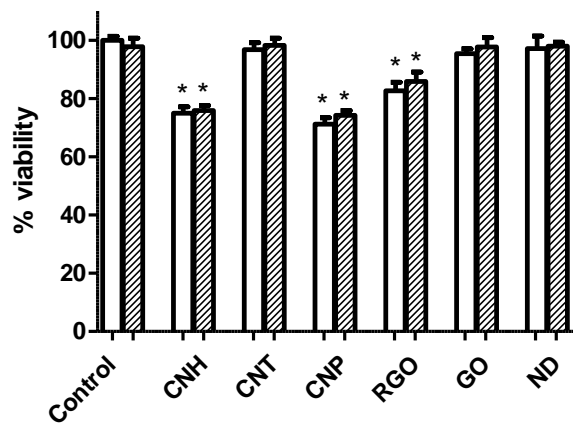

(b)

**Figure S4.** Cell viability assays after 24 h (white) and 72 h (striped) of incubation with various carbon nanomaterials at  $0.6 \mu\text{g}\cdot\text{mL}^{-1}$  showing differential effects on (a) Caco-2 and (b) MCF-7 cells. Values that are significantly different from the control ( $p < 0.05$ ) are denoted with asterisk (\*). Untreated cells were used as control.

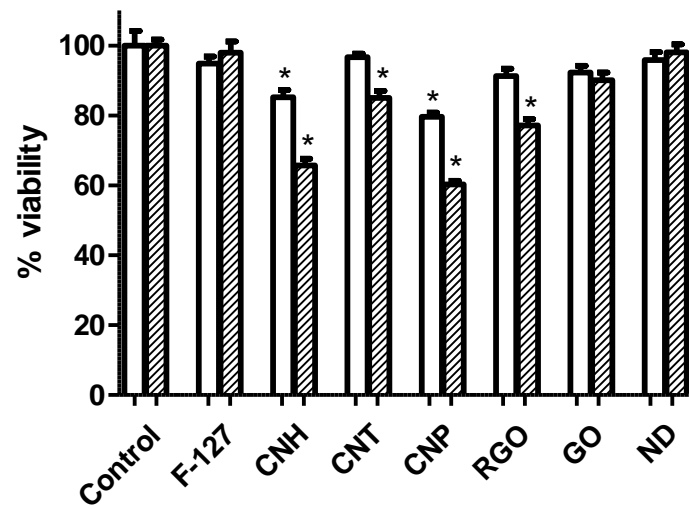

**Figure S5.** Cell viability assays after 24 h (white) and 72 h (striped) of incubation with various carbon nanomaterials at  $3.0 \mu\text{g}\cdot\text{mL}^{-1}$ , and also F-127 at  $15 \mu\text{g}\cdot\text{mL}^{-1}$ , showing differential effects on human dermal fibroblasts. Values that are significantly different from the control ( $p < 0.05$ ) are denoted with asterisk (\*). Untreated cells were used as control.

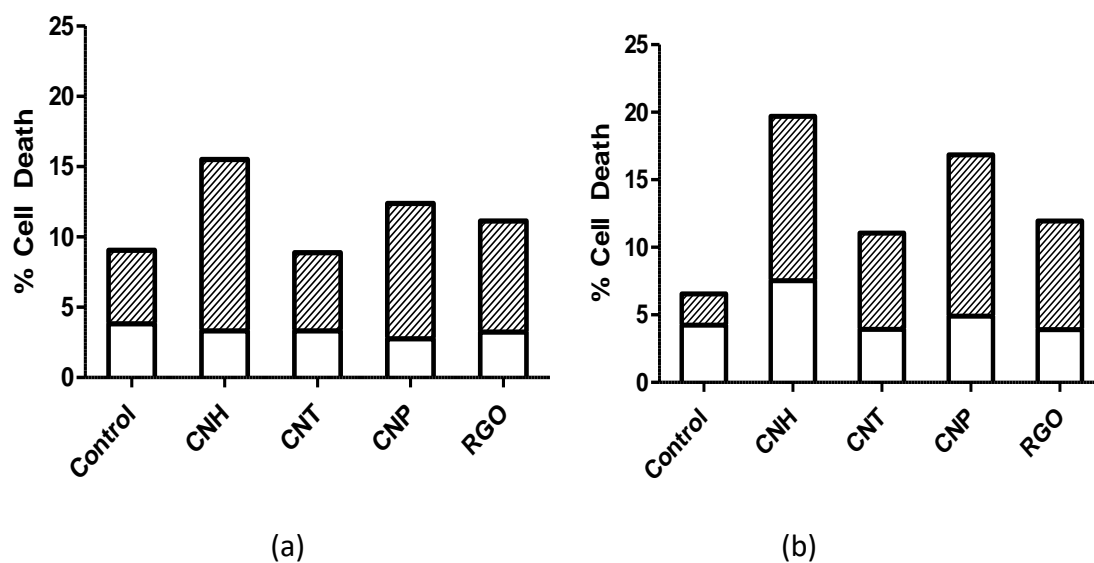

**Figure S6.** Bar graphs corresponding to flow cytometry analysis, quantifying the percentage of early-stage apoptotic (white), and late-stage apoptotic/necrotic (striped) cells in response to exposure for 72 h to different carbon nanomaterials at  $3 \mu\text{g}\cdot\text{mL}^{-1}$  for (a) Caco-2 and (b) MCF-7 cells. Control represents untreated cells.



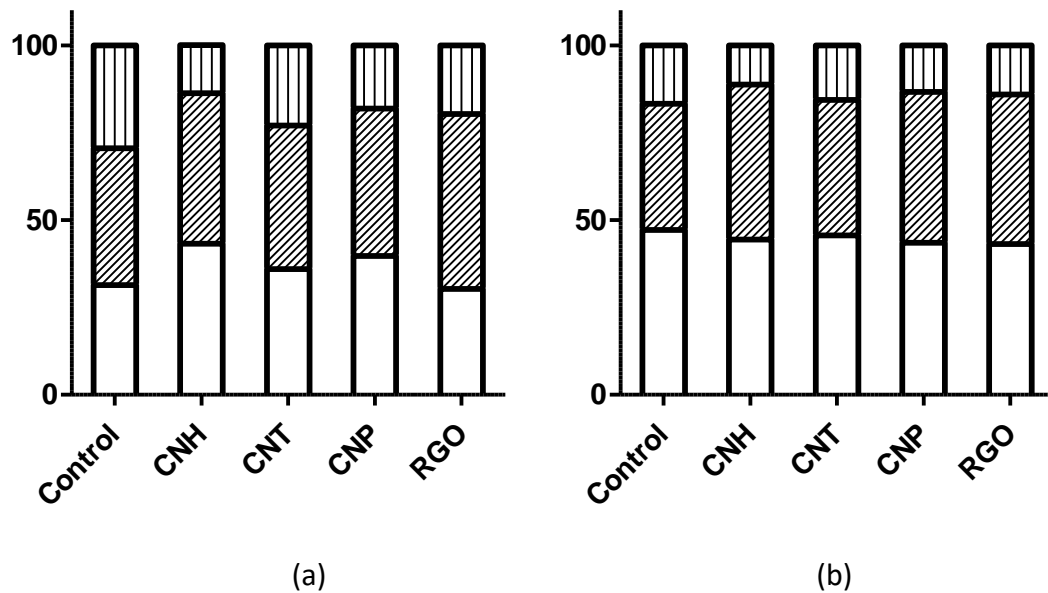

**Figure S7.** Quantitative distribution percentages of cell cycle phases for (a) Caco-2 and (b) MCF-7, after treatment with carbon nanomaterials at 3 µg·mL<sup>-1</sup> for 72 h. Control represents untreated cells. ( □ G1, ▨ S, ▤ G2).

(a)

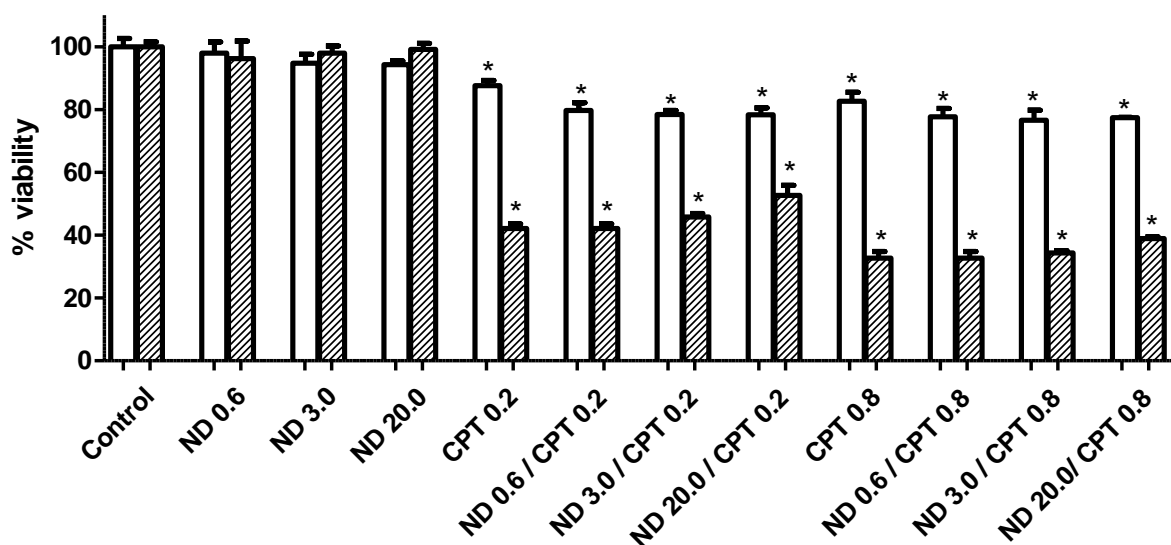

(b)

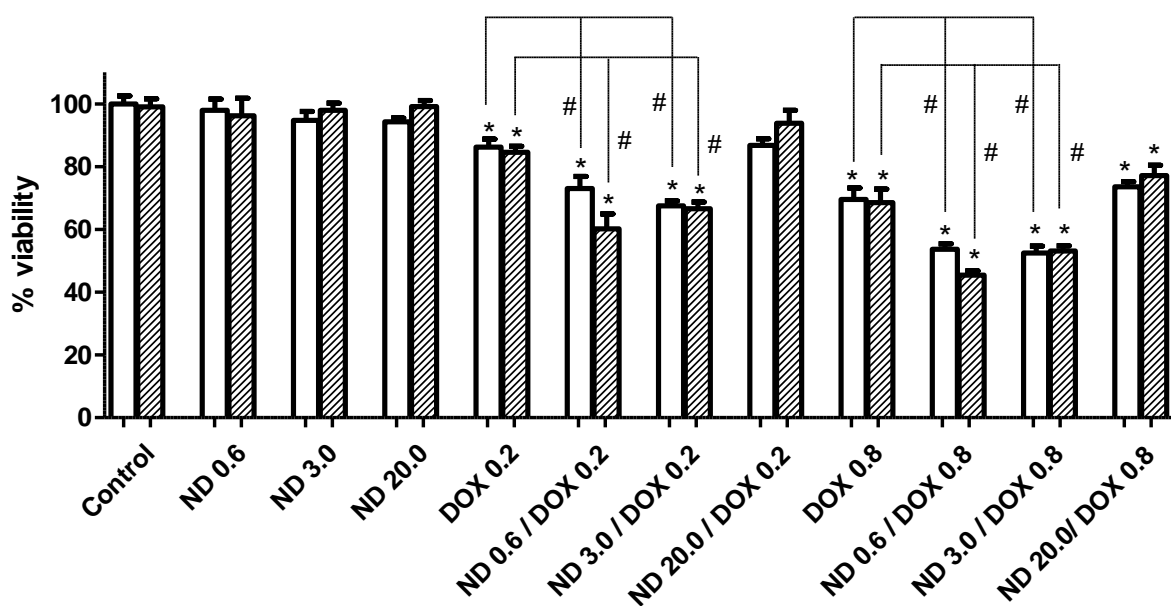

**Figure S8.** Cell viability assays for Caco-2 cells after 24 h (white) and 72 h (striped) of incubation with ND at 0.6, 3.0 and 20.0  $\mu\text{g}\cdot\text{mL}^{-1}$ , free drugs (a) CPT and (b) DOX, at 0.2 and 0.8  $\mu\text{g}\cdot\text{mL}^{-1}$ , and (a) CPT- and (b) DOX- loaded carbon nanomaterials. (\* and # represent significance at  $p < 0.05$  when compared to untreated control cells and free drug-treated cells, respectively).
